# Supplementary material
Source: publisher figshare collection journal article supplement (https://karger.figshare.com/articles/dataset/_/4021080)
Supplement: Supplementary file 1 [file 1]

a.

|           |                                                                |     |
|-----------|----------------------------------------------------------------|-----|
| rat       | KGLEIGVLVNNVGM LPNLLPSHFLSTSGESQ---SVIHCNITSVVKMTQLVLKHMESRRR  | 173 |
| mouse     | EGLENGILVNNVGM LPSPFFPSHFLSSSGESQ---NLIHCNITSVVKMTQLVLKHMESRRK | 173 |
| human     | AGLEIGILVNNVGM LPNLLPSHFLNAPDEIQ---SLIHCNITSVVKMTQLILKHMESRQK  | 177 |
| zebrafish | EGLDIGVLVNNVGILPSQIPCKLLETSDLEERIYDIVNCNVKSMVKMCRIVLPGMQQRRR   | 179 |
|           | NNAG NhxG                                                      |     |

b.

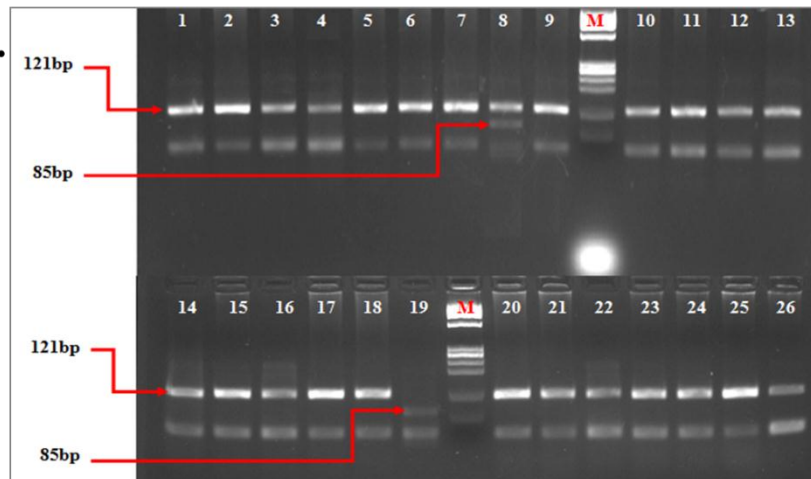

**Supple. figure (2):** p.M164T mutation: (a.) multiple sequence alignment of amino acids sequence of 17 $\beta$ HSD-3 protein, the red arrow indicating the mutant amino acid position. (b.) RFLP analysis on 3% agarose gel of exon 7 of HSD17B3 gene digested with AccI restriction enzyme. Lane 8 showing the heterozygous pattern of the mother, Lane 19 showing the homozygous mutant pattern of the patient, all lanes other than that showing the wild type pattern.
