# Supplementary material
Source: publisher figshare collection journal article supplement (https://karger.figshare.com/articles/dataset/_/4021080)
Supplement: Supplementary file 2 [file 1]

**Supplemental table 1:** All detected mutations in HSD17B3 gene in patients with 46,XY DSD

| No. | Mutant Exon | Mutation    | Mutation type/Effect                                         | Ethnicity       | Phenotype/Clinical presentation                                                                                                                                                                                                                | References                 |
|-----|-------------|-------------|--------------------------------------------------------------|-----------------|------------------------------------------------------------------------------------------------------------------------------------------------------------------------------------------------------------------------------------------------|----------------------------|
| 1   | Exon 1      | p.Trp50Stop | Nonsense/Truncated protein                                   | <i>Egyptian</i> | 46,XY DSD; well-developed breasts (B5), pubic hair (P5) and axillary hair (A3), moderate hirsutism mainly affecting the lower limbs, failure to menstruate, and clitoris-like phallus with normal female external genitalia (Sinnecker type 5) | <i>Hassan et al., 2013</i> |
| 2   |             | p. Ala51Val | Missense (Found in compound heterozygosity with p.Gln176Pro) | <i>Egyptian</i> | 46,XY DSD; ambiguous genitalia, bilateral palpable gonads, labioscrotal folds with single opening, and penis-like phallus                                                                                                                      | <i>The current study</i>   |
| 3   | Exon 2      | p.Ser65Leu  | Missense/Inactivates enzyme                                  | Iranian         | 46,XY DSD; evaluated for hirsutism, clitoromegaly and failure to menstruate.                                                                                                                                                                   |                            |

|   |        |            |                                                        |                                                           |                                                                                                                                                                                            |                           |
|---|--------|------------|--------------------------------------------------------|-----------------------------------------------------------|--------------------------------------------------------------------------------------------------------------------------------------------------------------------------------------------|---------------------------|
| 4 |        | p.Thr54Ala | Missense                                               | Egyptian                                                  | 46,XY DSD; hirsutism in body and face, and well developed breasts (B5), pubic hair (P5) and axillary hair (A2). No palpable gonads, and penis like phallus                                 | <i>The current study</i>  |
| 5 |        | p.Ala56Thr | Missense/Severe impairment of enzyme                   | South Asian                                               | 46,XY DSD; female prepubertal external genitalia, pubertal virilization, severe hair growth, voice changes and clitoral enlargement (6 months, child diagnosed because of family history). |                           |
| 6 | Exon 3 | p.Asn74Thr | Missense                                               | Dutch                                                     | 46,XY DSD; ambiguous genitalia, pubertal virilization.                                                                                                                                     |                           |
| 7 |        | p.Arg80Gln | Missense/Impaired enzyme activity (NADPH binding site) | Palestinian, Dutch, Brazilian, Portuguese, <b>Turkish</b> | 46,XY DSD; ambiguous genitalia at birth to mild clitoromegaly, pubertal virilization, male gender role, and many reassigned as males if raised as girls.                                   | <i>Demir et al., 2015</i> |

|    |          |                                                                                              |                                                                                               |                                             |                                                                                                                                                                                                                                                   |                                                 |
|----|----------|----------------------------------------------------------------------------------------------|-----------------------------------------------------------------------------------------------|---------------------------------------------|---------------------------------------------------------------------------------------------------------------------------------------------------------------------------------------------------------------------------------------------------|-------------------------------------------------|
| 8  |          | Duplication that spans exons 3-10 of the HSD17B3 gene and extends from intron 2 to intron 10 | Duplication (Found in compound heterozygosity with p.R80Q)                                    | <i>Cypriot</i>                              | 46,XY DSD; ambiguous genitalia, small penis, perineal blind vaginal pouch and posterior labioscrotal fusion.                                                                                                                                      | <i>Neocleous et al., 2012</i>                   |
| 9  |          | p.Arg80Trp                                                                                   | Missense/Complete loss of enzyme activity (NADPH binding site)                                | Spanish, Italian, <i>Lebanese, Iranian</i>  | 46,XY DSD; female external genitalia, palpable gonads, clitoral enlargement and virilization at puberty.                                                                                                                                          | <i>George et al., 2011; Omrani et al., 2011</i> |
| 10 | Intron 3 | c.325+2T>G                                                                                   | Splice junction/Disrupts splice donor site (found in compound heterozygosity with c.325+4A>T) | <i>Brazilian</i>                            | 46,XY DSD; pubic hair was Tanner stage 4, the vagina ended in a 3-cm pouch, and no gonads were palpable, also presented with acne, hirsutism, voice deepening, phallus enlargement, and the skin of labioscrotal folds were pigmented and rugged. | <i>Castro et al., 2012</i>                      |
| 11 |          | c.325+4A>T                                                                                   | Splice junction/Disrupts splice acceptor site                                                 | Dutch, Brazilian, German, American, Italian | 46,XY DSD; normal female to ambiguous genitalia, palpable inguinal gonads.                                                                                                                                                                        |                                                 |

|    |          |             |                                               |                     |                                                                                                                              |                           |
|----|----------|-------------|-----------------------------------------------|---------------------|------------------------------------------------------------------------------------------------------------------------------|---------------------------|
| 12 |          | c.326–1G>C  | Splice junction                               | Dutch,<br>Brazilian | 46,XY DSD; inguinal hernia, failure of breast development, facial and body hair growth, voice changes, clitoral enlargement. |                           |
| 13 | Exon 5   | p.Asn130Ser | Missense/Severe impairment of enzyme activity | English,<br>German  | 46,XY DSD; pubertal virilization, mild clitoromegaly, voice changes.                                                         |                           |
| 14 | Exon 6   | p.H155P     | Missense                                      | <i>Turkish</i>      | 46,XY DSD; normal clitoral size and vaginal and urethral openings, palpable gonads in the inguinal region                    | <i>Demir et al., 2015</i> |
| 15 | Intron 6 | c.538–1G>A  | Splice junction                               | Unknown             | 46,XY DSD.                                                                                                                   |                           |
| 16 | Exon 7   | p.Met164Thr | Missense                                      | <i>Egyptian</i>     | 46,XY DSD, ambiguous genitalia, two palpable gonads, single opening, and penis like phallus                                  | <i>The current study</i>  |
| 17 |          | c.585delG   | Deletion/ Truncated protein                   | <i>Egyptian</i>     | 46,XY DSD, ambiguous genitalia, two palpable gonads, single opening, and clitoris like phallus                               | <i>The current study</i>  |

|    |          |              |                                          |                                                   |                                                                                                                                                              |                               |
|----|----------|--------------|------------------------------------------|---------------------------------------------------|--------------------------------------------------------------------------------------------------------------------------------------------------------------|-------------------------------|
| 18 | Intron 7 | c.572+2T>A   | Splice junction                          | <i>Sudanese</i>                                   | 46,XY DSD, primary amenorrhea, undeveloped breasts, male pattern secondary characteristics, and external genitalia showed type IV genital circumcision.      | <i>Ellaithi et al., 2014</i>  |
| 19 | Exon 8   | p.Gln176Pro  | Missense                                 | American (Italian, German-Irish), <i>Egyptian</i> | 46,XY DSD; clitoromegaly and coarsening of voice, scrotalization of labia majora and inguinal masses.<br>46,XY DSD; ambiguous genitalia, Quigley score was 3 | <i>The current study</i>      |
| 20 |          | c.608delT    | Deletion/Downstream premature Stop codon | German                                            | 46,XY DSD; female prepubertal development, clitoral enlargement at 12 years of age, testes in inguinal canal.                                                |                               |
| 21 |          | p.Ala188Val  | Missense/Inactivates enzyme              | Turkish                                           | 46,XY DSD; prepubertal female external genitalia, inguinal mass.                                                                                             |                               |
| 22 |          | p.Trp192Stop | Nonsense/Truncated protein               | <i>Omani</i>                                      | 46,XY DSD; ambiguous genitalia                                                                                                                               | <i>Al-Sinani et al., 2015</i> |

|    |          |             |                                                                           |                                        |                                                                                                                                                           |                          |
|----|----------|-------------|---------------------------------------------------------------------------|----------------------------------------|-----------------------------------------------------------------------------------------------------------------------------------------------------------|--------------------------|
| 23 |          | p.Leu194Pro | Missense (Found in compound heterozygosity with silent mutation c.588C>T) | <i>Egyptian</i>                        | 46,XY DSD; virilization after puberty and chest hair, two openings, and penis like phallus                                                                | <i>The current study</i> |
| 24 |          | p.Met197Lys | Missense/Alters secondary protein structure                               | Afghan                                 | 46,XY DSD; pubertal virilization, facial hair, 4–8 cm phallus and labioscrotal folds.                                                                     |                          |
| 25 | Intron 8 | c.655–1G>A  | Splice junction/Disrupts splice acceptance site                           | Syrian, Turkish, Dutch, Greek-American | 46,XY DSD; prepubertal female external genitalia, pubertal virilization, male gender role.                                                                |                          |
| 26 | Exon 9   | p.Ala203Val | Missense/Inactivates enzyme                                               | African-Brazilian, Italian             | 46,XY DSD; absence of menses, failure of breast development, facial and chest hair and clitoral enlargement, male and female gender identity in siblings. |                          |
| 27 |          | p.Ala203Glu | Missense                                                                  | Southern Italian                       | 46,XY DSD; pubertal virilization.                                                                                                                         |                          |
| 28 |          | p.Val205Glu | Missense/Inactivates enzyme                                               | White American, English                | 46,XY DSD; prepubertal female external genitalia to perineoscrotal hypospadias, primary amenorrhea, mild clitoromegaly.                                   |                          |

|    |         |                     |                                                                 |                               |                                                                                                                                                               |                                |
|----|---------|---------------------|-----------------------------------------------------------------|-------------------------------|---------------------------------------------------------------------------------------------------------------------------------------------------------------|--------------------------------|
| 29 |         | p.Phe208Ile         | Missense/Inactivates enzyme                                     | German                        | 46,XY DSD; born with ambiguous genitalia, clitoromegaly (1.5 cm) and posterior fusion and scrotalization of the labia majora which contained palpable masses. |                                |
| 30 |         | p.Leu212Gln         | Missense/Inactivates enzyme                                     | Italian                       | 46,XY DSD; inguinal mass, mild clitoromegaly compound hetrozygous with M235V.                                                                                 |                                |
| 31 |         | c.461_467delGCACCCG | Deletion (Found in compound heterozygosity with c.761_762delAG) | <i>Turkish</i>                | 46,XY DSD; female external genitalia, 2 palpable gonads                                                                                                       | <i>Sagsak et al., 2015</i>     |
| 32 |         | p.Glu215Asp         | Missense/Inactivates enzyme                                     | White Brazilian, English      | 46,XY DSD; female or ambiguous genitalia at birth, male behaviors in childhood, pubertal virilization, absence of menses, male gender role.                   |                                |
| 33 |         | p.Cys206Stop        | Nonsense/Truncated protein                                      | <i>Tunisian</i>               | 46,XY DSD; female Prader IV.                                                                                                                                  | <i>Ben Rhouma et al., 2012</i> |
| 34 | Exon 10 | p.Ser232Leu         | Missense/Inactivates enzyme                                     | African-American, South Asian | 46,XY DSD; clitoromegaly, primary amenorrhea, absent labia minora, severe hypospadias with undermasculinization – raised as males and females.                |                                |

|    |         |                     |                                                                      |                                         |                                                                                                                                                           |                                                            |
|----|---------|---------------------|----------------------------------------------------------------------|-----------------------------------------|-----------------------------------------------------------------------------------------------------------------------------------------------------------|------------------------------------------------------------|
| 35 |         | p.Met235Val         | Missense/Inactivates enzyme                                          | African-American, Italian               | 46,XY DSD; clitoromegaly, primary amenorrhea, inguinal masses.                                                                                            |                                                            |
| 36 |         | c.777–783delGATAACC | Deletion/Frame shift truncates protein                               | Polish, <b><i>Turkish, Egyptian</i></b> | 46,XY DSD; testis in herniorrhaphy sac, failure to menstruate.<br>46,XY DSD; ambiguous genitalia with two openings, and clitoromegaly                     | <b><i>Alikasifoglu et al., 2012; The current study</i></b> |
| 37 |         | c.761_762delAG      | Deletion (Found in compound heterozygosity with c.461_467delGCACCCG) | <b><i>Turkish</i></b>                   | 46,XY DSD; female external genitalia, 2 palpable gonads                                                                                                   | <b><i>Sagsak et al., 2015</i></b>                          |
| 38 |         | p.Cys268Tyr         | Missense/Inactivates enzyme                                          | Pakistani                               | 46,XY DSD; prominent clitoris, palpable inguinal gonads.                                                                                                  |                                                            |
| 39 |         | p.His271Arg         | Missense/Inactivates enzyme                                          | French                                  | 46,XY DSD                                                                                                                                                 |                                                            |
| 40 | Exon 11 | p.Pro282Leu         | Missense/Inactivates enzyme                                          | White American, Dutch                   | 46,XY DSD; clitoromegaly, failure of breast development and deepening of voice.                                                                           |                                                            |
| 41 |         | p.Tyr287Stop        | Nonsense/Truncated protein                                           | <b><i>Turkish</i></b>                   | Tanner stage 5. The patient had hirsutism and deepening voice change with normal female external genitalia except for a cliteromegaly (sinnecker type 5). | <b><i>Tuhan et al., 2015</i></b>                           |



|                                                                                                                                    |  |             |                      |                                                          |                                                                                                                                                                |                                                      |
|------------------------------------------------------------------------------------------------------------------------------------|--|-------------|----------------------|----------------------------------------------------------|----------------------------------------------------------------------------------------------------------------------------------------------------------------|------------------------------------------------------|
| 42                                                                                                                                 |  | p.Gly289Ser | Polymorphism/Unknown | Italian, West Indian, <b><i>Brazilian, Egyptians</i></b> | 46,XY DSD; normal female prepubertal genitalia, bilateral inguinal hernia at sonography. 46,XY DSD; ambiguous genitalia, single opening and penis-like phallus | <b><i>Castro et al., 2012; The current study</i></b> |
| * A modified table of <b><i>George et al., 2010</i></b> with the references of the added cases in <b><i>Bold Italic</i></b> style. |  |             |                      |                                                          |                                                                                                                                                                |                                                      |
